# Supplementary material for: Identification of candidate genes associated with porcine meat color traits by genome-wide transcriptome analysis
Source: PubMed Central journal article supplement (PMC5066258; doi:10.1038/srep35224), 2016-10-17
Supplement: srep35224-s1.pdf [file srep35224-s1.pdf]

**Identification of candidate genes associated with porcine  
meat color traits by genome-wide transcriptome analysis**

**Bojiang Li<sup>1,+</sup>, Chao Dong<sup>1,+</sup>, Pinghua Li<sup>1</sup>, Zhuqing Ren<sup>2,3</sup>, Han Wang<sup>1</sup>,  
Fengxiang Yu<sup>1</sup>, Caibo Ning<sup>1</sup>, Kaiqing Liu<sup>1</sup>, Wei Wei<sup>1</sup>, Ruihua Huang<sup>1</sup>, Jie Chen<sup>1</sup>,  
Wangjun Wu<sup>1,\*</sup> & Honglin Liu<sup>1,\*</sup>**

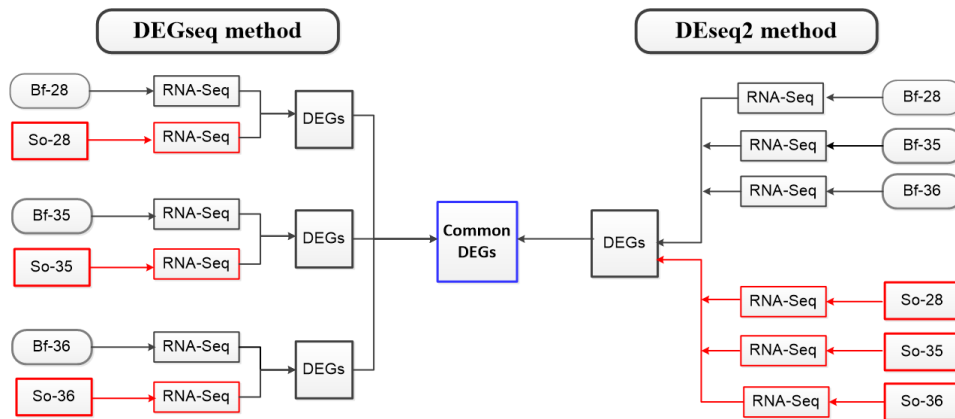

**Supplementary Figure S1. Strategy of DEGs screening.** Left and right parts show the workflow identified differentially expressed genes (DEGs) by DEGseq and DESeq2 methods, respectively.

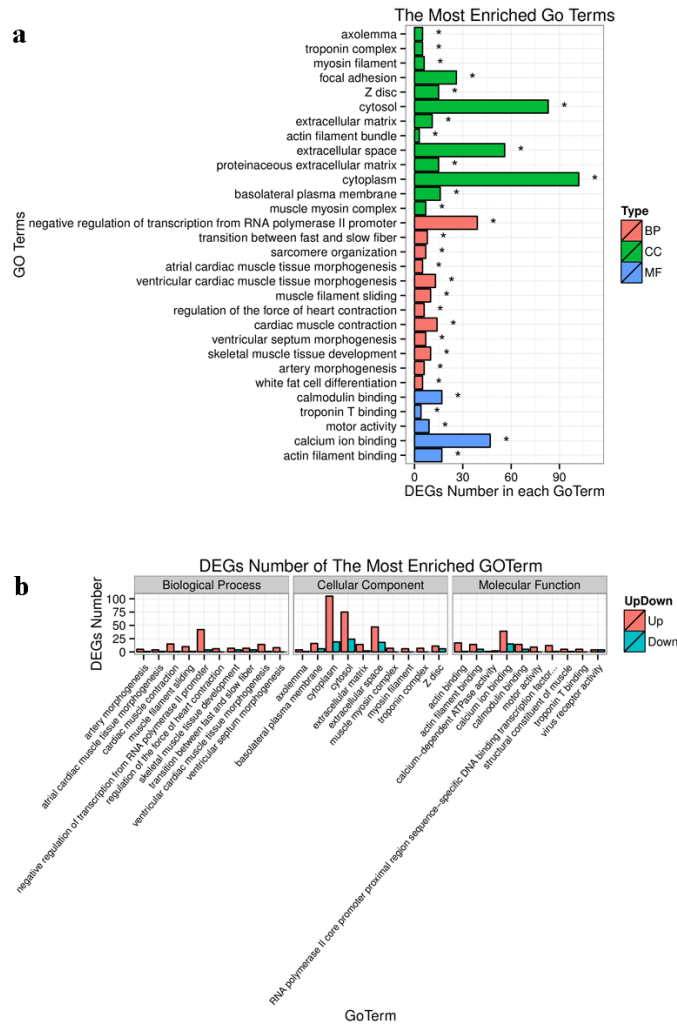

**Supplementary Figure S2. Enriched GO terms and corresponding DEGs numbers of each term for Bf28-vs-Sol28. (a), The most enriched top 30 Go terms, BP: biological process; CC: cellular component; MF: molecular function. (b), DEGs number of the most enriched 10 GO terms derived from BP, CC and MF, respectively.**

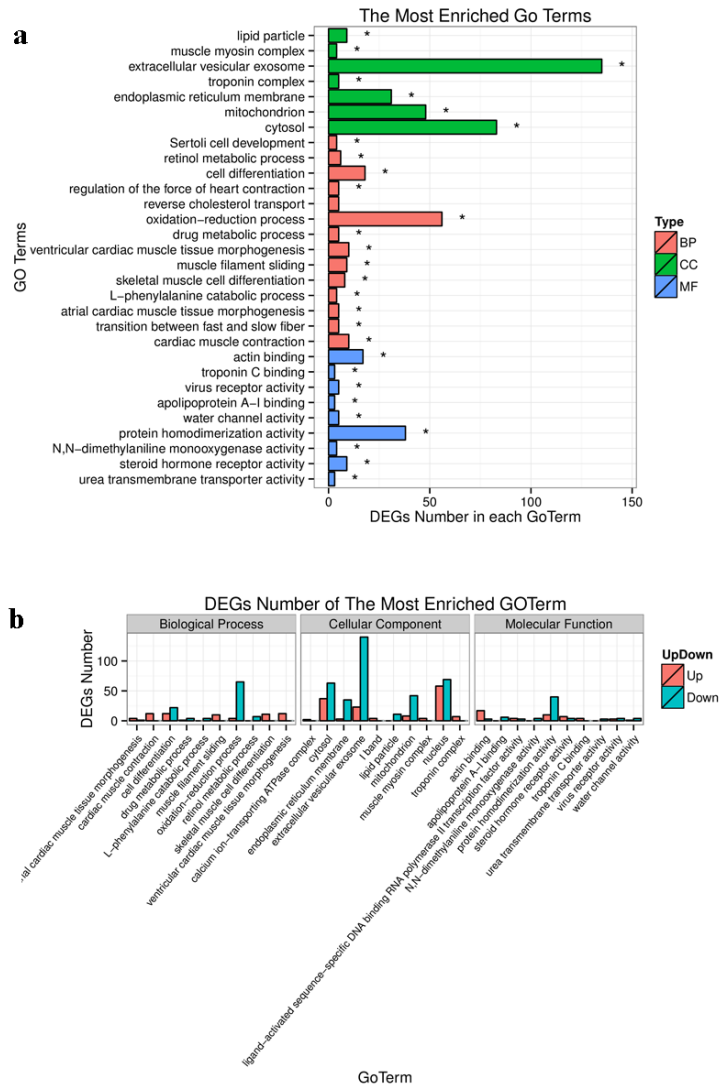

**Supplementary Figure S3. Enriched GO terms and corresponding DEGs numbers of each term for Bf35-vs-Sol35. (a),** The most enriched top 30 Go terms, BP: biological process; CC: cellular component; MF: molecular function. **(b),** DEGs number of the most enriched 10 GO terms derived from BP, CC and MF, respectively.

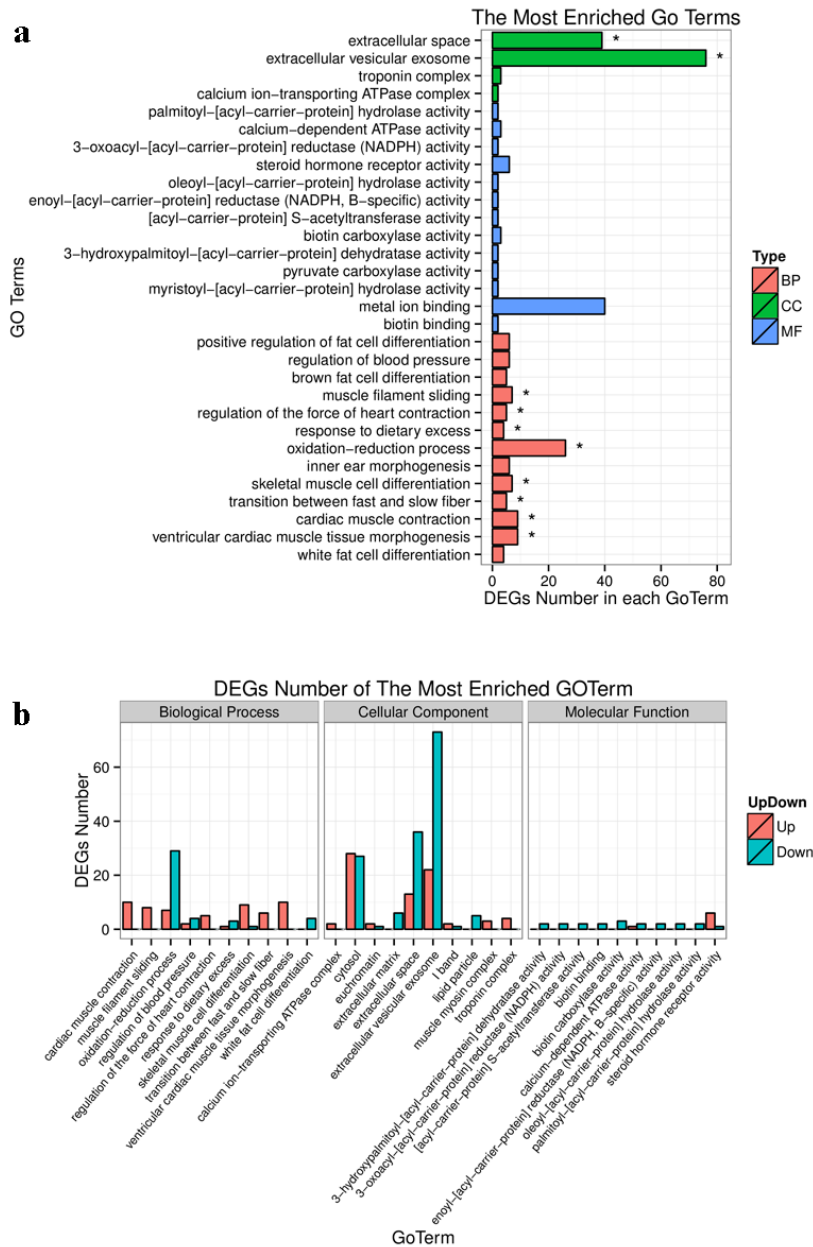

**Supplementary Figure S4. Enriched GO terms and corresponding DEGs numbers of each term for Bf36-vs-Sol36. (a), The most enriched top 30 Go terms, BP: biological process; CC: cellular component; MF: molecular function. (b), DEGs number of the most enriched 10 GO terms derived from BP, CC and MF, respectively.**

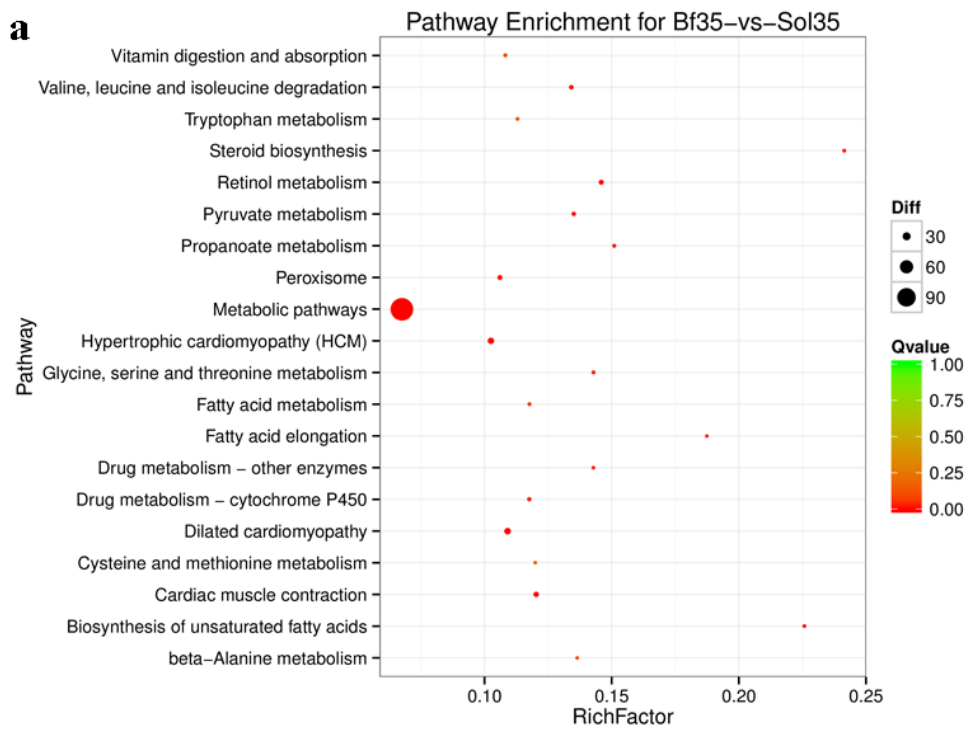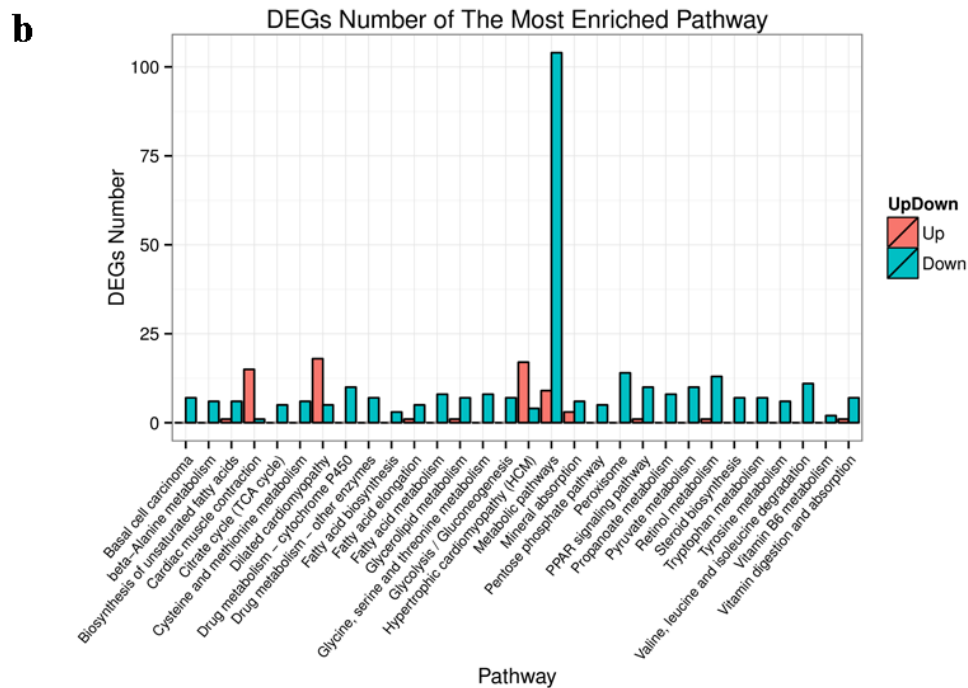

**Supplementary Figure S5. Enriched pathways and corresponding DEGs number of each pathway for Bf28-vs-Sol28. (a),** The most enriched 20 pathways, the size of black circle represents the DEGs number; Different color represents the significant test Q value. **(b),** DEGs number of the most enriched 30 pathways.

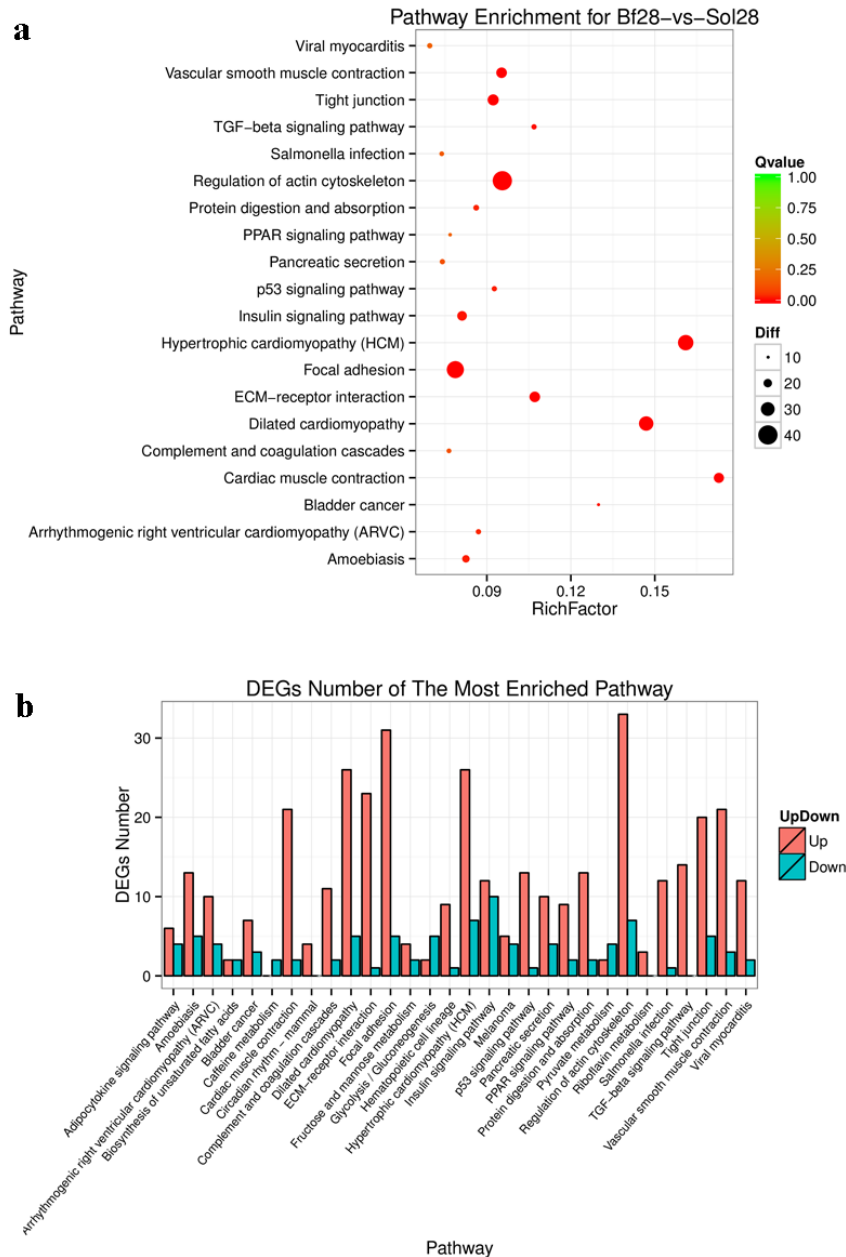

**Supplementary Figure S6. Enriched pathways and corresponding DEGs number of each pathway for Bf35-vs-Sol35. (a),** The most enriched 20 pathways, the size of black circle represents the DEGs number; Different color represents the significant test Q value. **(b),** DEGs number of the most enriched 30 pathways.

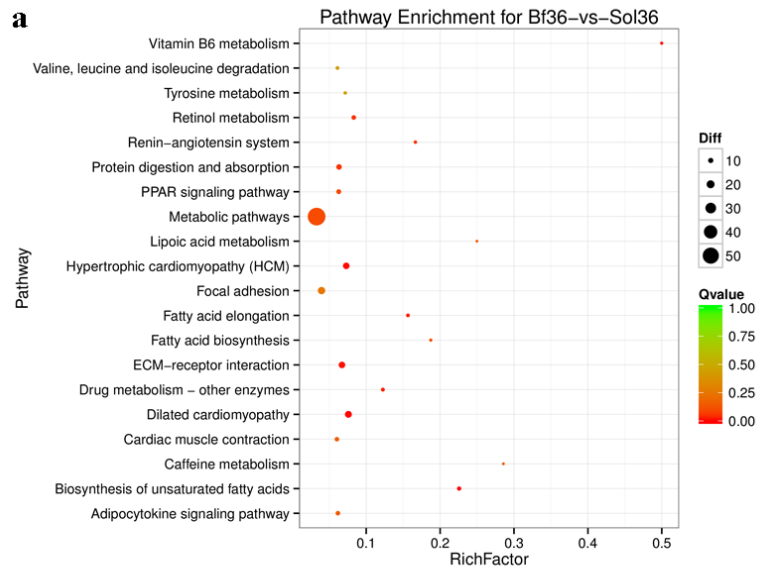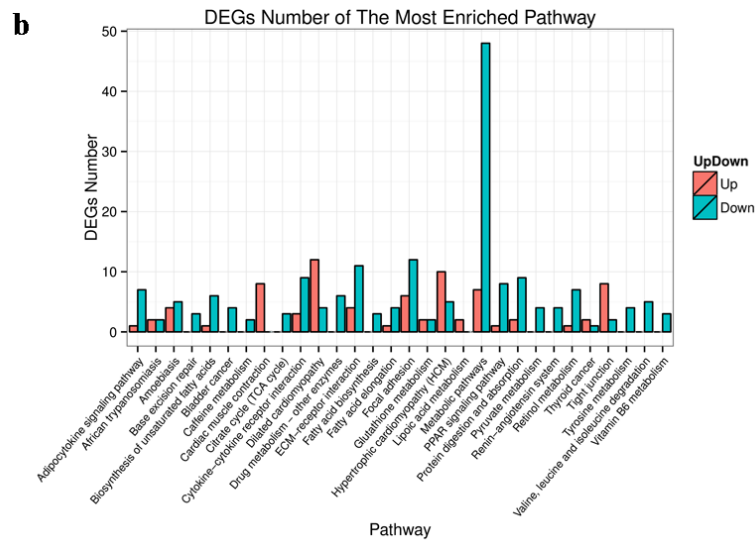

**Supplementary Figure S7. Enriched pathways and corresponding DEGs number of each pathway for Bf36-vs-Sol36. (a),** The most enriched 20 pathways, the size of black circle represents the DEGs number; Different color represents the significant test Q value. **(b),** DEGs number of the most enriched 30 pathways.
